# Supplementary material for: FORUM paper: The significance of soils and soil science towards realization of the UN sustainable development goals (SDGs)
Source: Copernicus journal article supplement (doi:10.5194/soil-2015-88), 2016-01-18
Supplement: Supplementary file 1 [file soil-2015-88-supplement.pdf]

# The significance of soils and soil science towards realization of the UN sustainable development goals

A GRAPHICAL ABSTRACT

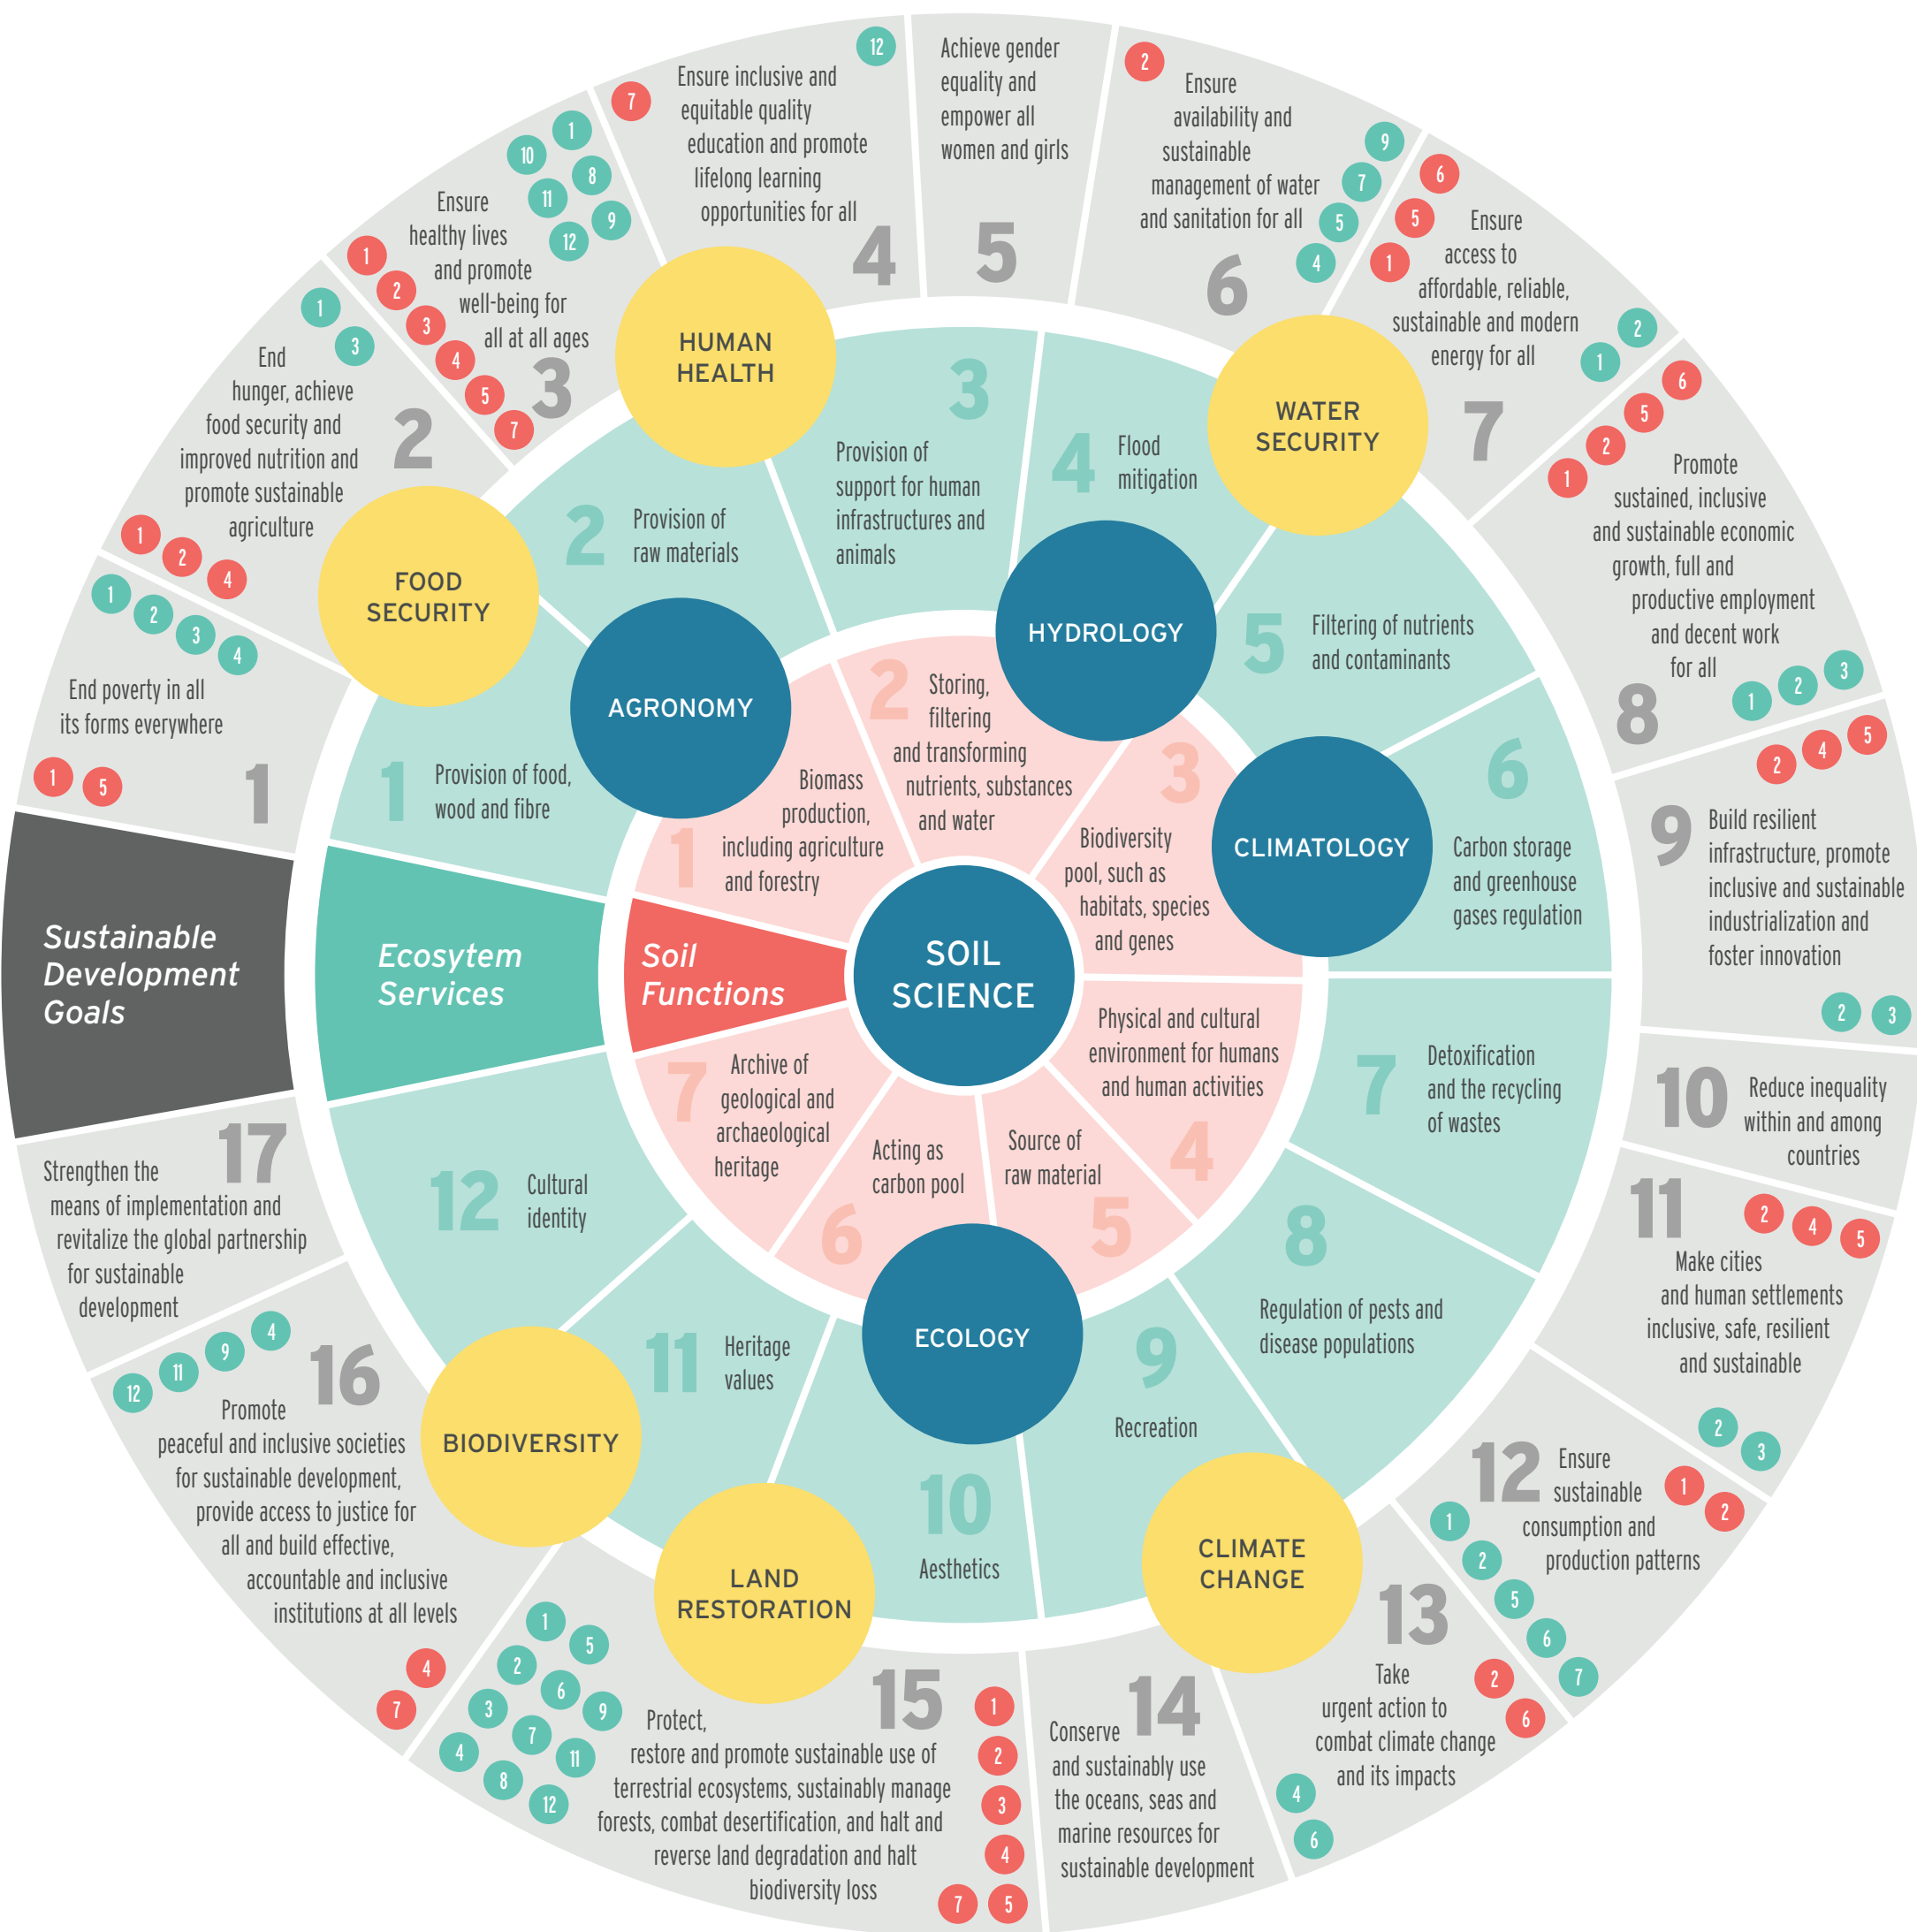

FORUM paper: The significance of soils and soil science towards realization of the UN sustainable development goals (SDGs)  
 Keesstra, S.D., Bouma, J., Wallinga, J., Tiftonell, P., Smith, P., Cerdà A., Montanarella, L., Quinton, J., Pachepsky, Y., van der Putten, W.H, Bardgett, R.D, Moolenaar, S., Mol, G., Fresco, L.O.
